# Supplementary material for: Maßnahmen zur Hitze- und Starkregenvorsorge in Kitas und Pflegeeinrichtungen: Eine Evaluation von Risikowahrnehmung, Kommunikation und Informationsmaterialien
Source: Springer Nature journal article supplement (doi:10.1007/s00103-024-03876-8), 2024-04-24
Supplement: MOESM1 [file 27011468]

## Zusätzliche Onlinematerialien

Heidenreich, Deppermann, Thieken & Otto (2024): Maßnahmen zur Hitze- und Starkregenvorsorge für Kitas und Pflegeeinrichtungen: Eine Evaluation von Risikowahrnehmung und Informationsmaterialien

**Tabelle A1. Übersicht der kontaktierten und erreichten Teilnehmenden.**

|                            | <b>Angeschrieben</b> | <b>Teilgenommen</b> | <b>Rücklaufquote in %<sup>1</sup></b> |
|----------------------------|----------------------|---------------------|---------------------------------------|
| Stadtverwaltung            | 1232                 | 198                 | 16,1                                  |
| Träger                     | 575                  | 100                 | 17,4                                  |
| Einrichtungen <sup>2</sup> | -                    | 35                  | -                                     |
| Insgesamt                  | 1807                 | 333                 | 18,4                                  |

*Anmerkung:* <sup>1</sup> Die angegebene Rücklaufquote gibt nur eine grobe Tendenz wieder, da zu beachten ist, dass die Befragung zusätzlich über die Webseite beworben wurde und der Einladungslink von einigen Empfänger:innen an andere weitergeleitet wurde. <sup>2</sup>Einrichtungen wurden 2021 nicht kontaktiert, daher lässt sich hier keine prozentuale Rücklaufquote berechnen.

**Tabelle A2. Abteilung der befragten Mitarbeitenden der Stadtverwaltungen.**

|                         | <i>n</i> | %     |
|-------------------------|----------|-------|
| Gesundheit und Soziales | 171      | 86,4  |
| Umwelt und Klima        | 17       | 8,6   |
| Anderes                 | 8        | 4,0   |
| nicht beantwortet       | 3        | 1,5   |
| Gesamt                  | 198      | 100,0 |

*Anmerkung:* Eine Person gab an, im Bereich Umwelt und Gesundheit zu arbeiten, und wurde daher sowohl dem Bereich Gesundheit und Soziales als auch Umwelt und Klima zugeordnet.

**Tabelle A3. Überblick Soziodemographie nach Befragtengruppe (Alter, Geschlecht und Bundesland; M: Mittelwert, SD: Standardabweichung, N: Fallzahl).**

|                        | Stadt |      | Träger |      | Einrichtung |      | Gesamt |      |
|------------------------|-------|------|--------|------|-------------|------|--------|------|
|                        | M     | SD   | M      | SD   | M           | SD   | M      | SD   |
| <b>Alter</b>           | 46,9  | 11,1 | 48,8   | 9,6  | 50,8        | 9,5  | 47,9   | 10,5 |
| N                      | 152   |      | 79     |      | 29          |      | 260    |      |
| <b>Geschlecht</b>      | N     | %    | N      | %    | N           | %    | N      | %    |
| weiblich               | 139   | 70,2 | 81     | 81,0 | 32          | 91,4 | 252    | 75,7 |
| männlich               | 36    | 18,2 | 15     | 15,0 | 1           | 2,9  | 52     | 15,6 |
| divers                 | 1     | 0,5  | 1      | 1,0  | 0           | 0,0  | 2      | 0,6  |
| nicht beantwortet      | 12    | 6,1  | 2      | 2,0  | 0           | 0,0  | 14     | 4,2  |
| keine Angabe           | 10    | 5,1  | 1      | 1,0  | 2           | 5,7  | 13     | 3,9  |
| <b>Bundesland</b>      | N     | %    | N      | %    | N           | %    | N      | %    |
| Baden-Württemberg      | 20    | 10,1 | 14     | 14,0 | 5           | 14,3 | 39     | 11,7 |
| Bayern                 | 34    | 17,2 | 6      | 6,1  | 3           | 8,6  | 43     | 12,9 |
| Berlin                 | 7     | 3,5  | 3      | 3,0  | 0           | 0,0  | 10     | 3,0  |
| Brandenburg            | 2     | 1,0  | 1      | 1,0  | 0           | 0,0  | 3      | 0,9  |
| Bremen                 | 4     | 2,0  | 1      | 1,0  | 0           | 0,0  | 5      | 1,5  |
| Hamburg                | 3     | 1,5  | 1      | 1,0  | 0           | 0,0  | 4      | 1,2  |
| Hessen                 | 11    | 5,6  | 4      | 4,0  | 3           | 8,6  | 18     | 5,4  |
| Mecklenburg-Vorpommern | 0     | 0,0  | 3      | 3,0  | 0           | 0,0  | 3      | 0,9  |
| Niedersachsen          | 11    | 5,6  | 20     | 20,0 | 3           | 8,6  | 34     | 10,2 |
| Nordrhein-Westfalen    | 31    | 15,7 | 15     | 15,0 | 2           | 5,7  | 48     | 14,4 |
| Rheinland-Pfalz        | 8     | 4,0  | 24     | 24,0 | 7           | 20,0 | 39     | 11,7 |
| Saarland               | 2     | 1,0  | 1      | 1,0  | 0           | 0,0  | 3      | 0,9  |
| Sachsen                | 4     | 2,0  | 3      | 3,0  | 1           | 2,9  | 8      | 2,4  |
| Sachsen-Anhalt         | 8     | 4,0  | 3      | 3,0  | 1           | 2,9  | 12     | 3,6  |
| Schleswig-Holstein     | 13    | 6,6  | 0      | 0,0  | 3           | 8,6  | 16     | 4,8  |
| Thüringen              | 33    | 16,7 | 0      | 0,0  | 7           | 20,0 | 40     | 12,0 |
| Keine Angabe           | 7     | 3,5  | 1      | 1,0  | 0           | 0,0  | 8      | 2,4  |
| <b>Gesamt</b>          | 198   | 100  | 100    | 100  | 35          | 100  | 333    | 100  |

*Anmerkung:* Bei der Frage nach dem Geschlecht war die Auswahl zwischen „weiblich“, „männlich“, „divers“ und „keine Angabe“ möglich. Zusätzlich haben einige Personen die Frage übersprungen, was sich in der Zeile „nicht beantwortet“ widerspiegelt.

**Tabelle A4. Ergebnisse einer Varianzanalyse mit Messwiederholung zwischen den Naturgefahren (Hitze/Starkregen als Innersubjektfaktor) und den befragten Gruppen (Zwischensubjektfaktor) hinsichtlich der Risikowahrnehmung (Betroffenheit, Thematisierung, Handlungswissen).**

|                        | Hitze |     | Starkregen |     | n   | Effekt      | F       | ANOVA  |          |
|------------------------|-------|-----|------------|-----|-----|-------------|---------|--------|----------|
|                        | M     | SD  | M          | SD  |     |             |         | df     | $\eta^2$ |
| <i>Betroffenheit</i>   |       |     |            |     |     |             |         |        |          |
| Stadtverwaltung        | 4,1   | 1,2 | 2,6        | 1,3 | 156 | Naturgefahr | 171,454 | 1; 266 | 0,392**  |
| Träger                 | 4,0   | 1,3 | 2,2        | 1,3 | 84  | Gruppe      | 2,372   | 2; 266 | 0,018    |
| Einrichtung            | 4,3   | 1,4 | 2,6        | 1,3 | 29  | Interaktion | 1,014   | 2; 266 | 0,008    |
| Gesamt                 | 4,1   | 1,3 | 2,5        | 1,3 | 269 |             |         |        |          |
| <i>Thematisierung</i>  |       |     |            |     |     |             |         |        |          |
| Stadtverwaltung        | 3,8   | 1,6 | 2,3        | 1,3 | 126 | Naturgefahr | 114,795 | 1; 228 | 0,335**  |
| Träger                 | 3,5   | 1,6 | 1,7        | 1,1 | 80  | Gruppe      | 3,571   | 2; 228 | 0,030    |
| Einrichtung            | 3,7   | 1,6 | 2,0        | 1,5 | 25  | Interaktion | 1,003   | 2; 228 | 0,009    |
| Gesamt                 | 3,7   | 1,6 | 2,1        | 1,3 | 231 |             |         |        |          |
| <i>Handlungswissen</i> |       |     |            |     |     |             |         |        |          |
| Stadtverwaltung        | 4,1   | 1,4 | 3,1        | 1,5 | 122 | Naturgefahr | 168,279 | 1; 223 | 0,430**  |
| Träger                 | 4,4   | 1,4 | 2,6        | 1,6 | 74  | Gruppe      | 0,463   | 2; 223 | 0,004    |
| Einrichtung            | 4,7   | 1,1 | 2,8        | 1,7 | 30  | Interaktion | 8,346   | 2; 223 | 0,070**  |
| Gesamt                 | 4,3   | 1,4 | 2,9        | 1,6 | 226 |             |         |        |          |

Anmerkung: \* $p \leq 0,01$ ; \*\* $p \leq 0,001$ . Unter „Naturgefahr“ wurde zwischen Hitze und Starkregen unterschieden. Als Gruppen wurden jeweils die Stadtverwaltungen, Träger und Einrichtungen verglichen.

**Tabelle A5. Ergebnisse einer zweifaktoriellen Varianzanalyse (ANOVA) zwischen den Naturgefahren (Hitze/Starkregen als Innersubjektfaktor) und den befragten Gruppen (Zwischensubjektfaktor) hinsichtlich der Handlungsabsichten (Unterstützung, Empfehlung)**

|                      | Hitze |     | Starkregen |     | n   | Effekt      | F       | ANOVA  |          |
|----------------------|-------|-----|------------|-----|-----|-------------|---------|--------|----------|
|                      | M     | SD  | M          | SD  |     |             |         | df     | $\eta^2$ |
| <i>Unterstützung</i> |       |     |            |     |     |             |         |        |          |
| Stadtverwaltung      | 3,1   | 1,3 | 2,3        | 1,2 | 189 | Naturgefahr | 145,696 | 1; 280 | 0,342**  |
| Träger               | 3,1   | 1,3 | 2,2        | 1,2 | 93  | Gruppe      | 0,847   | 1; 280 | 0,005    |
| Gesamt               | 3,1   | 1,3 | 2,3        | 1,2 | 282 | Interaktion | 0,310   | 1; 280 | 0,001    |
| <i>Empfehlung</i>    |       |     |            |     |     |             |         |        |          |
| Stadtverwaltung      | 3,4   | 1,4 | 2,4        | 1,3 | 190 | Naturgefahr | 163,142 | 1; 283 | 0,366**  |
| Träger               | 3,4   | 1,3 | 2,3        | 1,2 | 95  | Gruppe      | 0,344   | 1; 283 | 0,001    |
| Gesamt               | 3,4   | 1,3 | 2,4        | 1,3 | 285 | Interaktion | 0,866   | 1; 283 | 0,003    |

Anmerkung: \* $p \leq 0,01$ ; \*\* $p \leq 0,001$ . Unter „Naturgefahr“ wurde zwischen Hitze und Starkregen unterschieden. Als Gruppen wurden jeweils die Stadtverwaltungen, Träger und Einrichtungen verglichen.

Unterstützung und Empfehlung wurden mit den folgenden Items erfasst, die auf einer Skala von 1 = „keine Absicht“ bis 5 = „sehr starke Absicht“ beantwortet wurden:

„Wie sehr beabsichtigen Sie, in den kommenden Wochen...

[Unterstützung] Einrichtungen Unterstützungsmöglichkeiten zur Durchführung von Schutzmaßnahmen gegen Hitzewellen/Starkregen aufzuzeigen?

[Empfehlung] Einrichtungen die Durchführung einer oder mehrerer der vorgestellten Schutzmaßnahmen gegen Hitzewellen/Starkregen zu empfehlen?“

**Tabelle A6. Vorhandensein eigener Materialien zum Umgang mit Starkregen und/oder Hitze in den Stadtverwaltungen und bei Trägern**

|                                                            | Stadtverwaltung |      | Träger     |      |
|------------------------------------------------------------|-----------------|------|------------|------|
|                                                            | <i>N</i>        | %    | <i>N</i>   | %    |
| Materialien zum Umgang mit Starkregen vorhanden            | 25              | 12,6 | 6          | 6,0  |
| Materialien zum Umgang mit Hitze vorhanden                 | 62              | 31,3 | 41         | 41,0 |
| Materialien zum Umgang mit beiden Naturgefahren vorhanden* | 20              | 10,1 | 5          | 5,0  |
| Keine Materialien vorhanden                                | 51              | 25,8 | 39         | 39,0 |
| Keine Angabe                                               | 3               | 1,5  | 2          | 2,0  |
| Weiß nicht                                                 | 77              | 38,9 | 17         | 17,0 |
| <b>Gesamt</b>                                              | <b>198</b>      |      | <b>100</b> |      |

Anmerkung. \* Diese Zeile stellt die Schnittmenge aus beiden darüberliegenden Zeilen dar.

**Tabelle A7. Kontakt mit Einrichtungen**

|                                                                        | Stadtverwaltung |      | Träger     |      |
|------------------------------------------------------------------------|-----------------|------|------------|------|
|                                                                        | <i>N</i>        | %    | <i>N</i>   | %    |
| Wir stehen in Kontakt mit Kitas.                                       | 93              | 47,0 | 63         | 63,0 |
| Wir stehen in Kontakt mit Pflegeeinrichtungen.                         | 89              | 44,9 | 31         | 31,0 |
| Wir stehen sowohl mit Kitas als auch Pflegeeinrichtungen in Kontakt. * | 31              | 15,7 | 6          | 6,0  |
| Weder noch/keine Angabe                                                | 47              | 23,7 | 12         | 12,0 |
| <b>Gesamt</b>                                                          | <b>198</b>      |      | <b>100</b> |      |

Anmerkung. \* Diese Zeile stellt die Schnittmenge aus beiden darüberliegenden Zeilen dar.

Tabelle 8. Vorhandensein und Nutzung von Verteilern mit Einrichtungen unter Stadtverwaltungen und Trägern.

|                                                         | Stadtverwaltung |      | Träger |      |
|---------------------------------------------------------|-----------------|------|--------|------|
|                                                         | N               | %    | N      | %    |
| Verteiler für Kitas vorhanden                           | 103             | 52,0 | 60     | 60,0 |
| Verteiler für Pflegeeinrichtungen vorhanden             | 92              | 46,5 | 29     | 29,0 |
| Davon: Verteiler für beide vorhanden                    | 38              | 19,2 | 11     | 11,0 |
| Keine Verteiler Vorhanden                               | 3               | 1,5  | 3      | 3,0  |
| <i>Kanäle zur Kommunikation mit Kitas</i>               |                 |      |        |      |
| E-Mail                                                  | 98              | 49,5 | 59     | 59,0 |
| Telefon                                                 | 36              | 18,2 | 19     | 19,0 |
| Fax                                                     | 8               | 4,0  | 3      | 3,0  |
| Post                                                    | 33              | 16,7 | 14     | 14,0 |
| Andere                                                  | 27              | 13,6 | 15     | 15,0 |
| <i>Kanäle zur Kommunikation mit Pflegeeinrichtungen</i> |                 |      |        |      |
| E-Mail                                                  | 88              | 44,4 | 28     | 28,0 |
| Telefon                                                 | 27              | 13,6 | 8      | 8,0  |
| Fax                                                     | 9               | 4,5  | 2      | 2,0  |
| Post                                                    | 22              | 11,1 | 4      | 4,0  |
| Andere                                                  | 24              | 12,1 | 10     | 10,0 |
| <i>Kommunizierte Inhalte mit Kitas</i>                  |                 |      |        |      |
| Warnungen                                               | 48              | 24,2 | 25     | 25,0 |
| Informationen/Materialien zur Starkregenvorsorge        | 20              | 10,1 | 9      | 9,0  |
| Informationen/Materialien zur Hitzevorsorge             | 43              | 21,7 | 25     | 25,0 |
| Neue Beschlüsse, Verordnungen, o.ä.                     | 84              | 42,4 | 54     | 54,0 |
| <i>Kommunizierte Inhalte mit Pflegeeinrichtungen</i>    |                 |      |        |      |
| Warnungen                                               | 47              | 23,7 | 16     | 16,0 |
| Informationen/Materialien zur Starkregenvorsorge        | 17              | 8,6  | 8      | 8,0  |
| Informationen/Materialien zur Hitzevorsorge             | 50              | 25,3 | 22     | 22,0 |
| Neue Beschlüsse, Verordnungen, o.ä.                     | 72              | 36,4 | 21     | 21,0 |
| Gesamt                                                  | 198             |      | 100    |      |

**Tabelle A9. Ergebnisse der einfaktoriellen Varianzanalysen zum Gruppenunterschied der Wahrnehmung der Handlungsempfehlungen. Zusätzlich angegeben sind Mittelwerte (M), Standardabweichungen (SD) und die jeweilige Anzahl von Angaben je Gruppe (n).**

|                                        | <i>M</i> | <i>SD</i> | <i>n</i> | Effekt | <i>F</i> | ANOVA     |                |
|----------------------------------------|----------|-----------|----------|--------|----------|-----------|----------------|
|                                        |          |           |          |        |          | <i>df</i> | part. $\eta^2$ |
| <i>neu vs. bekannt</i>                 |          |           |          |        |          |           |                |
| Stadtverwaltung                        | 3,55     | 1,34      | 195      | Gruppe | 3,900    | 2,324     | 0,024          |
| Träger                                 | 3,37     | 1,49      | 98       |        |          |           |                |
| Einrichtung                            | 2,82     | 1,59      | 34       |        |          |           |                |
| Gesamt                                 | 3,42     | 1,43      | 327      |        |          |           |                |
| <i>interessant vs. uninteressant</i>   |          |           |          |        |          |           |                |
| Stadtverwaltung                        | 1,95     | 0,99      | 194      | Gruppe | 0,619    | 2,323     | 0,004          |
| Träger                                 | 2,02     | 1,00      | 98       |        |          |           |                |
| Einrichtung                            | 2,15     | 1,16      | 34       |        |          |           |                |
| Gesamt                                 | 1,99     | 1,01      | 326      |        |          |           |                |
| <i>hilfreich vs. nutzlos</i>           |          |           |          |        |          |           |                |
| Stadtverwaltung                        | 1,93     | 0,92      | 194      | Gruppe | 0,150    | 2,323     | 0,001          |
| Träger                                 | 1,90     | 0,88      | 98       |        |          |           |                |
| Einrichtung                            | 2,00     | 1,18      | 34       |        |          |           |                |
| Gesamt                                 | 1,93     | 0,94      | 326      |        |          |           |                |
| <i>gut anwendbar vs. nicht nutzbar</i> |          |           |          |        |          |           |                |
| Stadtverwaltung                        | 2,20     | 0,91      | 194      | Gruppe | 0,849    | 2,322     | 0,005          |
| Träger                                 | 2,12     | 0,88      | 98       |        |          |           |                |
| Einrichtung                            | 2,36     | 1,11      | 33       |        |          |           |                |
| Gesamt                                 | 2,19     | 0,92      | 325      |        |          |           |                |
